# Supplementary material for: Adaptive Introgression across Semipermeable Species Boundaries between Local Helicoverpa zea and Invasive Helicoverpa armigera Moths
Source: PubMed Central journal article supplement — Mol Biol Evol. 2020 Apr 29;37(9):2568–83. doi: 10.1093/molbev/msaa108 (PMC7475041; doi:10.1093/molbev/msaa108), 2020-04-29
Supplement: msaa108_supplementary_data.pdf [file msaa108_supplementary_data.pdf]

1 **Adaptive introgression across semipermeable species boundaries between local *Helicoverpa zea* and**  
2 **invasive *Helicoverpa armigera* moths**

3  
4 **Supplementary material**

5  
6 Wendy A. Valencia-Montoya<sup>1</sup>, Samia Elfekih<sup>2,3</sup>, Henry North<sup>1</sup>, Joana I. Meier<sup>1</sup>, Ian A. Warren<sup>1</sup>, Wee Tek Tay<sup>4</sup>,  
7 Karl H. J. Gordon<sup>4</sup>, Alexandre Spechts<sup>5</sup>, Silvana V. Paula-Moraes<sup>6</sup>, Rahul Rane<sup>4</sup>, Tom Walsh<sup>4</sup>, and Chris Jiggins<sup>1</sup>

8  
9 <sup>1</sup>Department of Zoology, University of Cambridge, Cambridge, United Kingdom.

10 <sup>2</sup>CSIRO Health and Biosecurity, Australian Animal Health Laboratory, Geelong, VIC, Australia

11 <sup>3</sup>Bio21 Institute, University of Melbourne, Parkville VIC 3052, Australia

12 <sup>4</sup>CSIRO Land and Water, Black Mountain Laboratories, Canberra, Australia.

13 <sup>5</sup>Embrapa Cerrados, Planaltina, Federal District, Brazil.

14 <sup>6</sup>West Florida Research and Education Center, University of Florida, Jay, FL, USA.  
15  
16  
17  
18  
19  
20

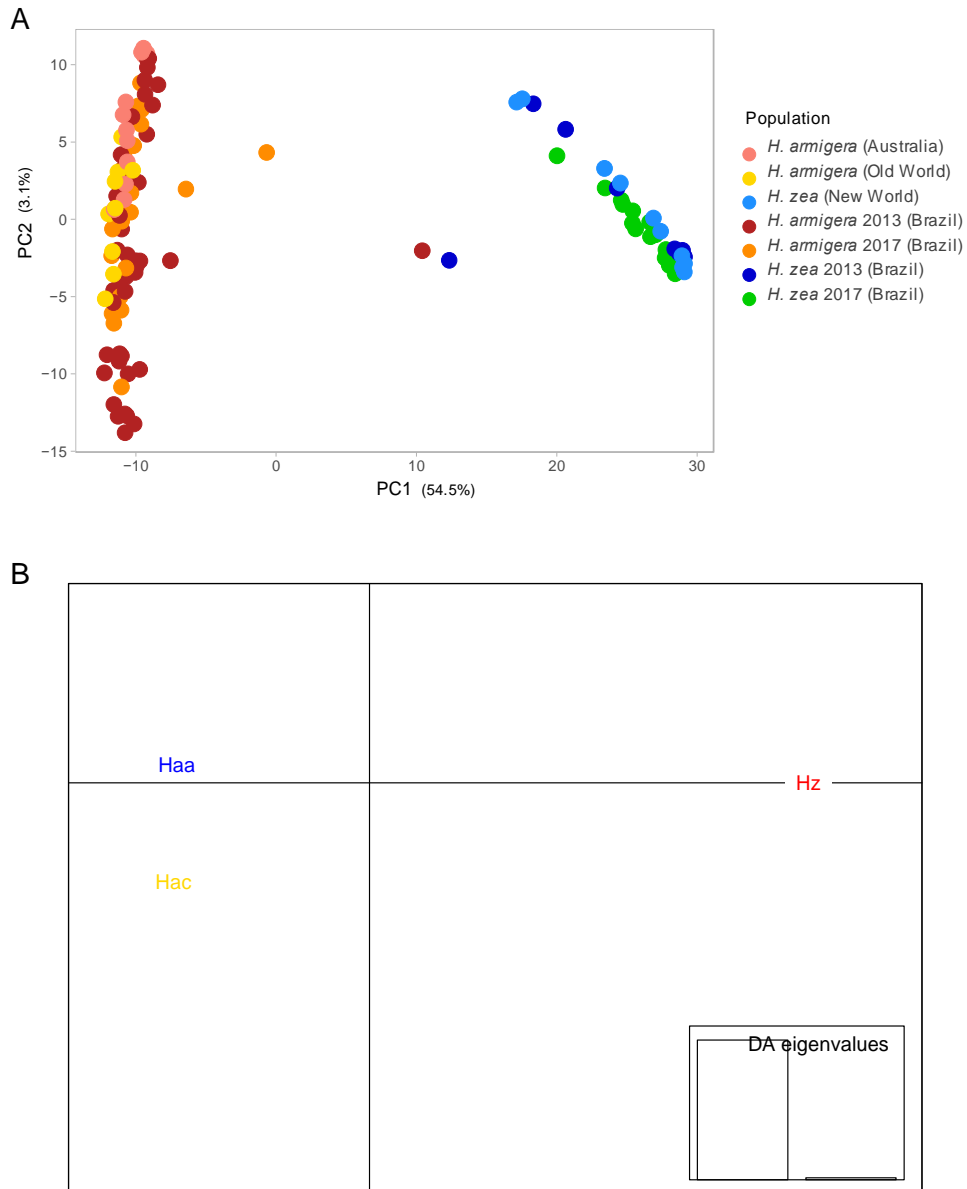

21

22 **Figure S1. *Helicoverpa armigera* and *H. zea* populations.** A. Principal Component Analysis of *Helicoverpa armigera*

23 and *H. zea*. B. Discriminant Component Analysis of *Helicoverpa* samples (DAPC) of *Helicoverpa armigera armigera*

24 (Haa), *H. a. conferta* (Hac), and *H. zea* (Hz) populations, resuming first 25 axes of variation.

25

26

27

28

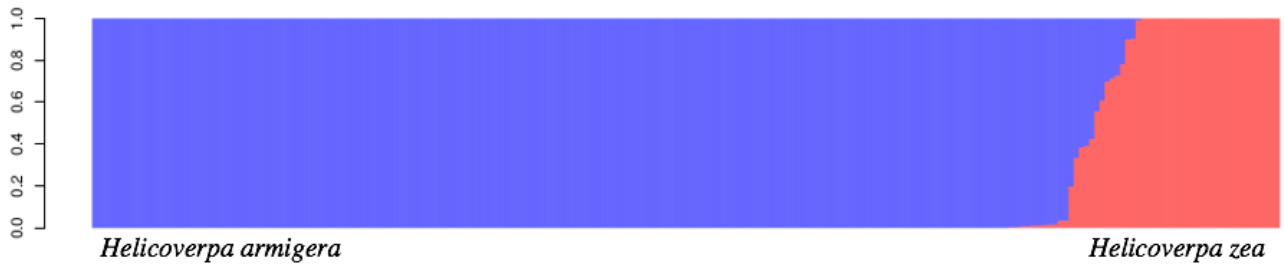

29  
30  
31  
32  
33  
34

**Figure S2. Admixture results for *Helicoverpa armigera* and *H. zea*.** Admixture results for  $k=2$ , the number of clusters that receive more support.

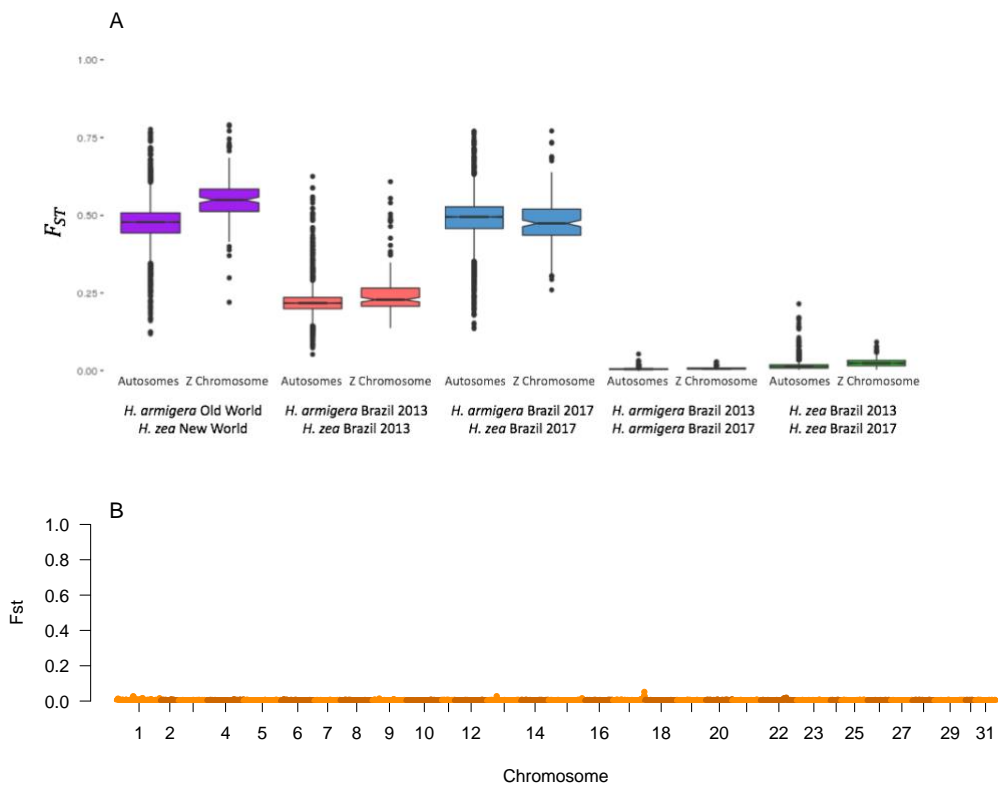

35  
36  
37  
38  
39  
40  
41

**Figure S3. Genome-wide  $F_{ST}$  for different populations.** **A.**  $F_{ST}$  for autosomes and Z-chromosome for different comparisons within and between species for allopatric and sympatric populations of *Helicoverpa armigera* and *H. zea*. **B.**  $F_{ST}$  between *H. armigera* 2013 and *H. armigera* 2017. The Z chromosome corresponds to the chromosome labelled as 1.

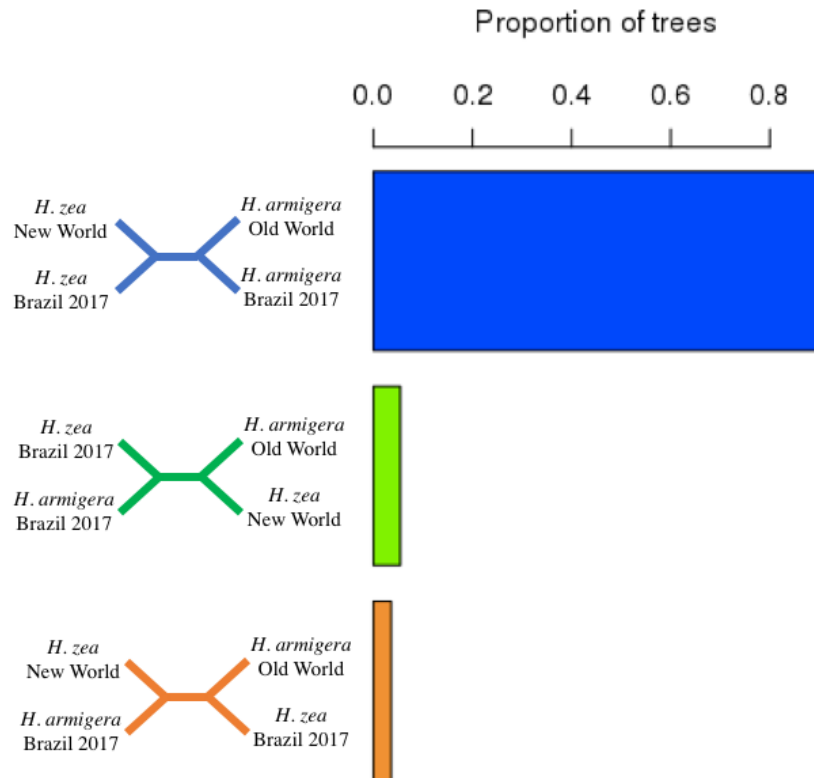

42

43 **Figure S4. Summary of the representation of the weights of the trees across the genome.** Proportion of the three  
 44 possible unrooted relations between the four samples: ((Old World *H. armigera*, Brazilian *H. armigera* 2017) (New World  
 45 *H. zea*, Brazilian *H. zea* 2017)). Blue represents the weight of the species topology ((Old World *H. armigera*, Brazilian *H.*  
 46 *armigera* 2017) (New World *H. zea*, Brazilian *H. zea* 2017)). Green ((Brazilian *H. zea* 2017, Brazilian *H. armigera* 2017)  
 47 (New World *H. zea*, Old World *H. armigera*)) and orange ((New World *H. zea*, Brazilian *H. armigera* 2017) (Brazilian *H.*  
 48 *zea* 2017, Old World *H. armigera*)).

49

50

51

52

53

54

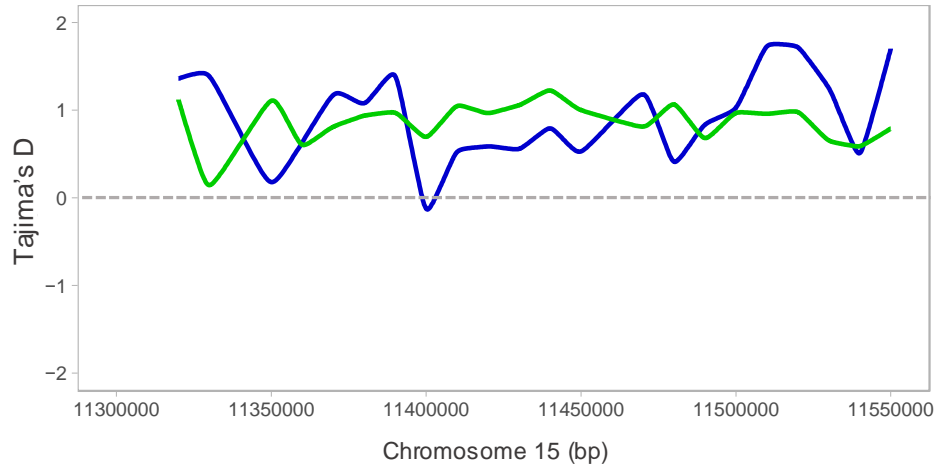

55

56 **Figure S5. Tajimas' D along the region in chromosome 15 containing *CYP337B3*.** Tajima's D along the region in  
57 chromosome 15 containing the *CYP337B* locus for populations of *H. zea* 2013 (blue) and *H. zea* in 2017 (green). Grey  
58 shading indicates the location of *CYP337B3*, and the dashed line indicates Tajima's D = 0.

59

60

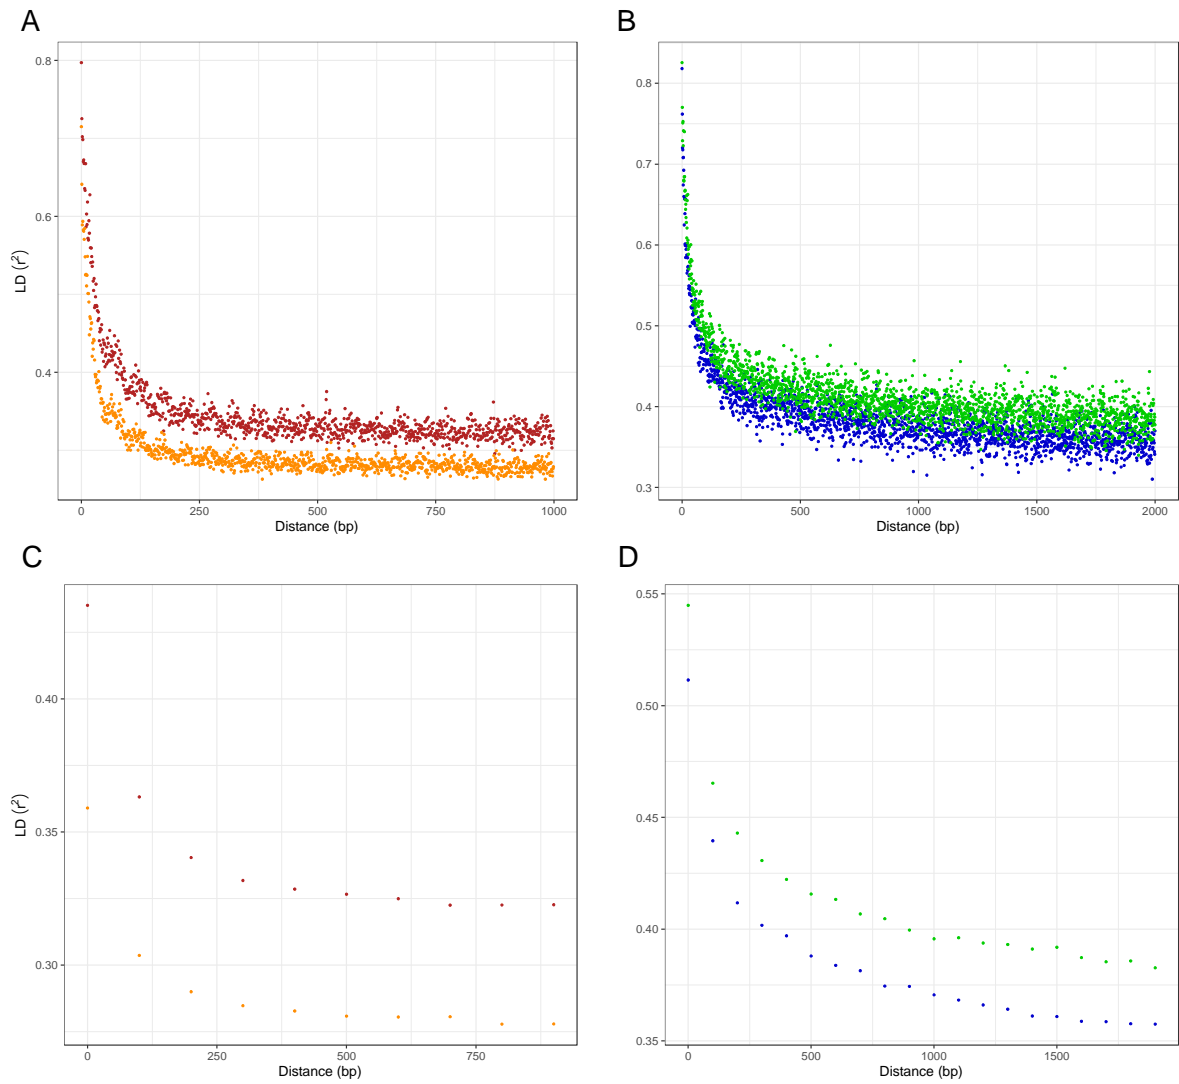

61

62 **Figure S6. Genome-wide LD decay. A.** LD decay for Brazilian *H. armigera* 2013 (red) and *H. armigera* 2017 (orange).

63 **B.** LD decay for Brazilian *H. zea* 2013 (blue) and *H. armigera* 2017 (green). **C.** LD decay for Brazilian *H. armigera* 2013

64 (red) and *H. armigera* 2017 (orange) in 100bp windows. **D.** LD decay for Brazilian *H. zea* 2013 (blue) and *H. zea* 2017

65 (green) in 100bp windows.

66

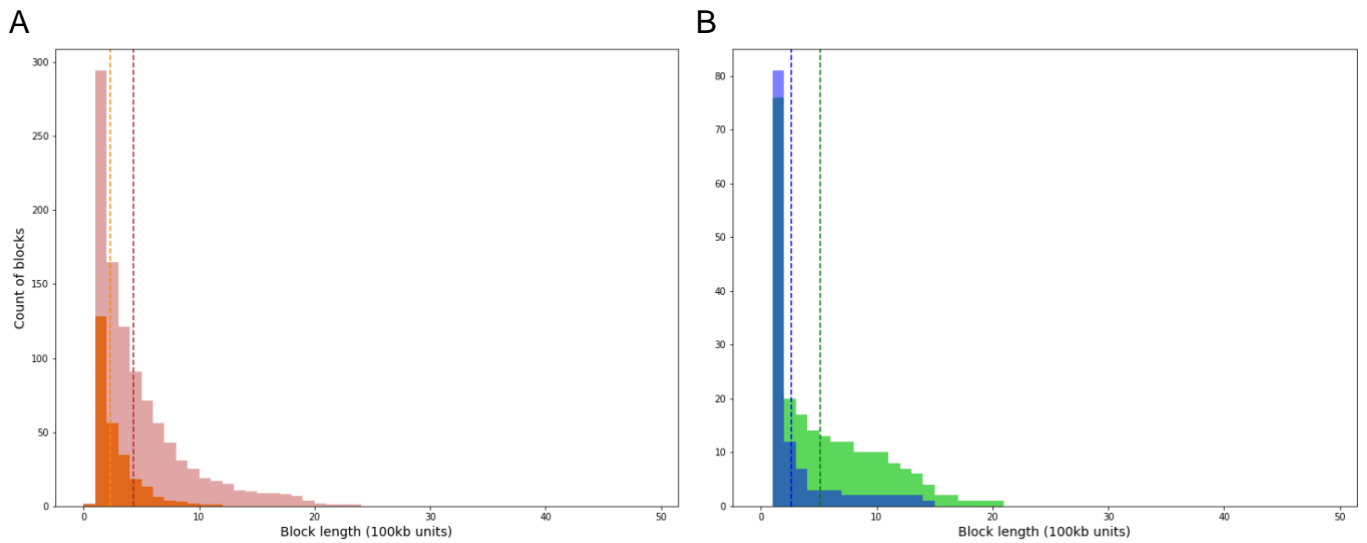

68

69 **Figure S7. Distribution of introgressed block lengths for *H. armigera* and *H. zea* populations in Brazil. A.**

70 Distribution of block length for *H. armigera* 2013 (red-pink) and *H. armigera* 2017 (orange) with the mean block length

71 for each population (dashed line). **B.** Distribution of block length for *H. zea* 2013 (blue) and *H. armigera* 2017 (green)

72 with the mean block length for each population (dashed line).

73

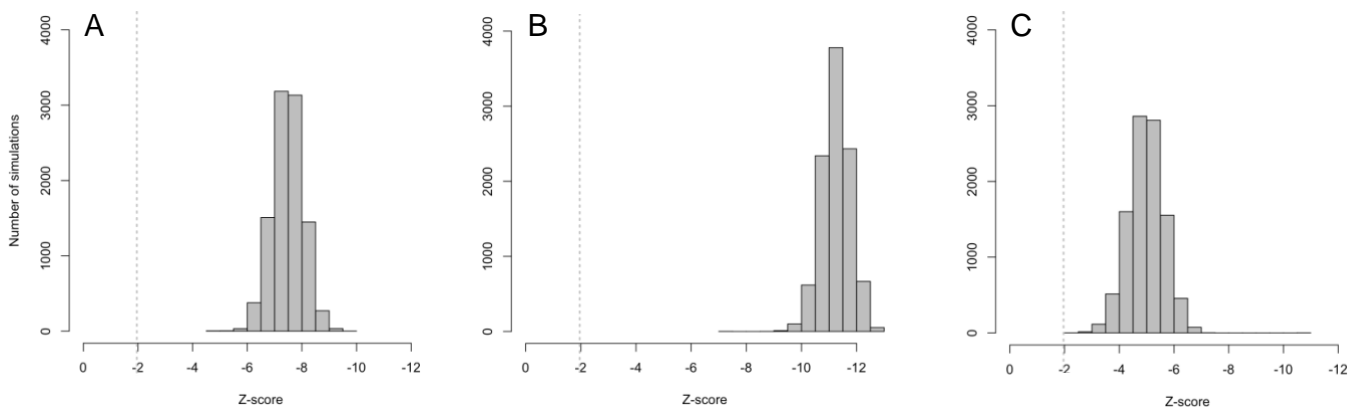

74

75 **Figure S8. Distribution of Z-scores resulting from tests between simulated neutral distributions of introgressed**

76 **block size and the observed distribution of introgressed blocks in *H. armigera* Brazil 2017. A.** Distribution of Z-

77 scores of tests between observed data set and simulated data sets with 4 generations/year. **B.** Distribution of Z-

78 tests between observed data set and simulated data sets with 9 generations/year. C. Distribution of Z-scores of tests  
79 between observed data set and simulated data sets with 12 generations/year. The dashed grey line indicates the  
80 significance threshold (p-value = 0.05). Note that we run 10,000 simulations per generation time and all the permutation  
81 tests between simulated and observed data sets support that the *H. armigera* 2017 population showed shorter introgressed  
82 tracts than expected by neutral recombination.

83

84

85

86

87

88

89

90

91

92

93

94

95

96

97

98

99

100

101

102

103

104

105



106

107 **Table S1.**  $F_{st}$  within and between species for allopatric and sympatric populations of *Helicoverpa armigera* and *H. zea*.108 *H. armigera* (Old World) refers to the subspecies *H. armigera armigera* distributed in the Old World, excluding109 Australia. *H. zea* (New World) comprises Brazilian pre-invasion and USA, and finally, *H. armigera* 2013/2017 and *H.*110 *zea* 2013/2017 refer to the post-invasion sympatric populations in Brazil.

111

112

| Population 1                 | Population 2            | Chromosome   | $F_{st}$ | Standard error |
|------------------------------|-------------------------|--------------|----------|----------------|
| <i>H. armigera</i> Old World | <i>H. zea</i> New World | Z-chromosome | 0.5534   | 0.0063         |
|                              |                         | Autosomes    | 0.4745   | 0.0012         |
| <i>H. armigera</i> 2013      | <i>H. armigera</i> 2017 | Z-chromosome | 0.0053   | 0.0003         |
|                              |                         | Autosomes    | 0.0032   | 0.0000         |
| <i>H. zea</i> 2013           | <i>H. zea</i> 2017      | Z-chromosome | 0.0273   | 0.0026         |
|                              |                         | Autosomes    | 0.0207   | 0.0003         |
| <i>H. armigera</i> 2013      | <i>H. zea</i> 2013      | Z-chromosome | 0.2484   | 0.0066         |
|                              |                         | Autosomes    | 0.2174   | 0.0008         |
| <i>H. armigera</i> 2017      | <i>H. zea</i> 2017      | Z-chromosome | 0.4891   | 0.0068         |
|                              |                         | Autosomes    | 0.4968   | 0.0013         |
| <i>H. zea</i> New World      | <i>H. zea</i> 2013      | Z-chromosome | 0.0339   | 0.0026         |
|                              |                         | Autosomes    | 0.0188   | 0.0003         |
| <i>H. zea</i> New World      | <i>H. zea</i> 2017      | Z-chromosome | 0.0233   | 0.0013         |
|                              |                         | Autosomes    | 0.0118   | 0.0003         |
| <i>H. armigera</i> Old World | <i>H. armigera</i> 2013 | Z-chromosome | 0.0107   | 0.0010         |
|                              |                         | Autosomes    | 0.0047   | 0.0001         |
| <i>H. armigera</i> Old World | <i>H. armigera</i> 2017 | Z-chromosome | 0.0162   | 0.0016         |
|                              |                         | Autosomes    | 0.0062   | 0.0002         |

113

114

115

116

117  
 118  
 119  
 120  
 121  
 122  
 123  
 124

**Table S2.** Results of F4-ratio test, which represent the mixing proportions of an admixture event. The populations are related to each other, as portrayed in the model below. Alpha represents the proportion derived from *H. armigera armigera* from each subpopulation. Below, model explaining the F-4 ratio test. B' and C' are the populations that are admixed in C. Adapted from Patterson et al. 2012 (1).

| Target population       | alpha               | Z-score | P-value  |
|-------------------------|---------------------|---------|----------|
| <i>H. armigera</i> 2013 | 0.949304 ± 0.003496 | 271.555 | < 0.0001 |
| <i>H. armigera</i> 2017 | 0.969701 ± 0.003354 | 289.131 | < 0.0001 |
| <i>H. zea</i> 2013      | 0.001761 ± 0.001555 | 1.132   | 0.2576   |
| <i>H. zea</i> 2017      | 0.021975 ± 0.003370 | 6.520   | < 0.0001 |

125

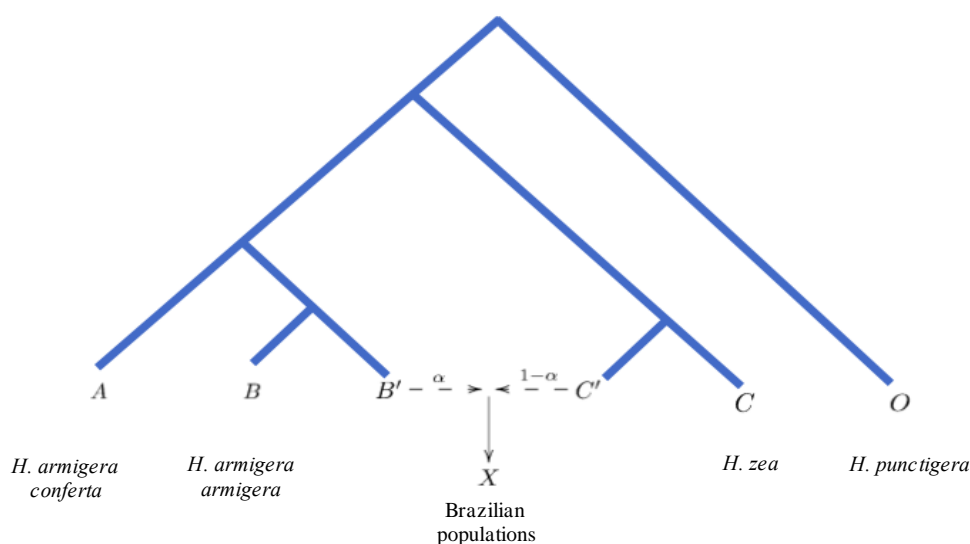

126  
 127  
 128  
 129

130

131

132

133

134

135 **Table S3.** Tajima's D calculated across 10kb windows. Mean and standard deviation were calculated using all windows  
136 across the genome that had more than 100 SNPs. Tajima's D at the window, including the *CYP337B3* locus. *CYP337B3+*  
137 refers to all the *H. zea* individuals that contain the *CYP337B3* gene.

138

139

| Population                          | Mean Tajima's D | Standard Deviation | Tajima's D at <i>CYP337B3</i> locus |
|-------------------------------------|-----------------|--------------------|-------------------------------------|
| <i>H. armigera</i> 2013             | -1.212          | 0.273              | -1.504                              |
| <i>H. armigera</i> 2017             | -0.983          | 0.357              | -0.582                              |
| <i>H. zea</i> 2013                  | 0.857           | 0.566              | 0.559                               |
| <i>H. zea</i> 2017                  | 0.275           | 0.592              | 1.058                               |
| <i>H. zea</i> 2017 <i>CYP337B3+</i> | 0.565           | 0.591              | -0.723                              |

140

**Tab. S4.** Sample sequencing and collection data, proportion of hybrid ancestry, and presence of *CYP337B3* in *H. armigera armigera* and *H. zea* individuals. The Heterozygous/Uncertain record is due to the chimeric nature of the *CYP337B3* gene, which makes it challenging to record the state when it is not homozygous.

| Individual    | Mean depth of variants | Species            | Country | Locality    | Collection date | Host                                 | Proportion derived from <i>H. zea</i> | <i>CYP337b3</i> |
|---------------|------------------------|--------------------|---------|-------------|-----------------|--------------------------------------|---------------------------------------|-----------------|
| 110_N704_S504 | 17.02                  | <i>H. armigera</i> | Brazil  | Mato Grosso | Jun-13          | Sunflower                            | 0.0454                                | Present         |
| 142_N703_S503 | 9.38                   | <i>H. armigera</i> | Brazil  | Mato Grosso | NA              | NA                                   | 0.0082                                | Present         |
| 6_1_1         | 32.53                  | <i>H. armigera</i> | Brazil  | Planaltina  | Nov-12          | Multicrop including soybean and corn | 0.0371                                | Present         |
| 6_1_10        | 17.04                  | <i>H. armigera</i> | Brazil  | Planaltina  | Nov-12          | Multicrop including soybean and corn | 0.0237                                | Present         |
| 6_1_2         | 51.82                  | <i>H. armigera</i> | Brazil  | Planaltina  | Nov-12          | Multicrop including soybean and corn | 0.0298                                | Present         |
| 6_1_20        | 12.05                  | <i>H. armigera</i> | Brazil  | Planaltina  | Feb-13          | Multicrop including soybean and corn | 0.0161                                | Present         |
| 6_1_22        | 37.22                  | <i>H. armigera</i> | Brazil  | Planaltina  | Feb-13          | Multicrop including soybean and corn | 0.0530                                | Present         |
| 6_1_3         | 19.07                  | <i>H. armigera</i> | Brazil  | Planaltina  | Nov-12          | Multicrop including soybean and corn | 0.0258                                | Present         |
| 6_1_4         | 14.94                  | <i>H. armigera</i> | Brazil  | Planaltina  | Nov-12          | Multicrop including                  | 0.0150                                | Present         |

|        |       |                    |        |            |        |                                                       |        |                        |
|--------|-------|--------------------|--------|------------|--------|-------------------------------------------------------|--------|------------------------|
| 6_1_5  | 49.00 | <i>H. armigera</i> | Brazil | Planaltina | Nov-12 | soybean and corn Multicrop including soybean and corn | 0.0432 | Present                |
| 6_1_7  | 65.17 | <i>H. armigera</i> | Brazil | Planaltina | Nov-12 | soybean and corn Multicrop including soybean and corn | 0.0375 | Present                |
| 6_1_8  | 26.87 | <i>H. armigera</i> | Brazil | Planaltina | Nov-12 | soybean and corn Multicrop including soybean and corn | 0.0338 | Present                |
| 6_2_1  | 17.82 | <i>H. armigera</i> | Brazil | Planaltina | Nov-13 | soybean and corn Multicrop including soybean and corn | 0.0236 | Present                |
| 6_2_3  | 10.90 | <i>H. armigera</i> | Brazil | Planaltina | Nov-13 | soybean and corn Multicrop including soybean and corn | 0.0116 | Heterozygous/Uncertain |
| 6_2_4  | 23.68 | <i>H. armigera</i> | Brazil | Planaltina | Nov-13 | soybean and corn Multicrop including soybean and corn | 0.0284 | Present                |
| 6_4_14 | 22.12 | <i>H. armigera</i> | Brazil | Planaltina | Nov-15 | soybean and corn Multicrop including soybean and corn | 0.0303 | Present                |
| 6_4_29 | 14.04 | <i>H.zea</i>       | Brazil | Planaltina | May-16 | soybean and corn Multicrop including soybean and corn | 0.9682 | Heterozygous/Uncertain |
| 6_4_30 | 10.20 | <i>H.zea</i>       | Brazil | Planaltina | May-16 | soybean and corn Multicrop including soybean and corn | 0.9700 | Heterozygous/Uncertain |

|        |       |                    |        |            |        |                                      |        |                        |
|--------|-------|--------------------|--------|------------|--------|--------------------------------------|--------|------------------------|
| 6_5_1  | 9.21  | <i>H. armigera</i> | Brazil | Planaltina | Feb-17 | Multicrop including soybean and corn | 0.0043 | Present                |
| 6_5_10 | 20.94 | <i>H.zea</i>       | Brazil | Planaltina | Oct-16 | Multicrop including soybean and corn | 0.9693 | Heterozygous/Uncertain |
| 6_5_11 | 20.87 | <i>H.zea</i>       | Brazil | Planaltina | Oct-16 | Multicrop including soybean and corn | 0.9687 | Absent                 |
| 6_5_13 | 20.90 | <i>H.zea</i>       | Brazil | Planaltina | Oct-16 | Multicrop including soybean and corn | 0.9654 | Heterozygous/Uncertain |
| 6_5_2  | 24.82 | <i>H.zea</i>       | Brazil | Planaltina | Feb-17 | Multicrop including soybean and corn | 0.9786 | Heterozygous/Uncertain |
| 6_5_20 | 18.58 | <i>H. armigera</i> | Brazil | Planaltina | Mar-17 | Multicrop including soybean and corn | 0.0246 | Present                |
| 6_5_24 | 13.90 | <i>H. armigera</i> | Brazil | Planaltina | Jan-17 | Multicrop including soybean and corn | 0.0131 | Present                |
| 6_5_25 | 18.07 | <i>H. armigera</i> | Brazil | Planaltina | Jan-17 | Multicrop including soybean and corn | 0.0214 | Present                |
| 6_5_26 | 16.99 | <i>H. armigera</i> | Brazil | Planaltina | Jan-17 | Multicrop including soybean and corn | 0.0208 | Present                |
| 6_5_29 | 12.87 | <i>H.zea</i>       | Brazil | Planaltina | Feb-17 | Multicrop including                  | 0.9755 | Absent                 |

|        |       |                     |        |            |        |                                                       |        |                        |
|--------|-------|---------------------|--------|------------|--------|-------------------------------------------------------|--------|------------------------|
| 6_5_30 | 44.37 | <i>H.zea</i>        | Brazil | Planaltina | Feb-17 | soybean and corn Multicrop including soybean and corn | 0.9810 | Absent                 |
| 6_5_6  | 6.40  | <i>Early hybrid</i> | Brazil | Planaltina | Jan-17 | Multicrop including soybean and corn                  | 0.2900 | Present                |
| 6_5_7  | 13.28 | <i>H.zea</i>        | Brazil | Planaltina | Nov-16 | Multicrop including soybean and corn                  | 0.9654 | Absent                 |
| 6_5_8  | 20.07 | <i>H. armigera</i>  | Brazil | Planaltina | Nov-16 | Multicrop including soybean and corn                  | 0.0254 | Present                |
| 6_5_9  | 19.20 | <i>H.zea</i>        | Brazil | Planaltina | Nov-16 | Multicrop including soybean and corn                  | 0.9671 | Present                |
| 7_1_10 | 7.04  | <i>H. armigera</i>  | Brazil | Bahia      | Mar-13 | Cotton                                                | 0.0047 | Present                |
| 7_1_11 | 7.68  | <i>H. armigera</i>  | Brazil | Bahia      | Mar-13 | Cotton                                                | 0.0046 | Absent                 |
| 7_1_12 | 11.59 | <i>H. armigera</i>  | Brazil | Bahia      | Mar-13 | Cotton                                                | 0.0108 | Present                |
| 7_1_13 | 10.15 | <i>H. armigera</i>  | Brazil | Bahia      | Mar-13 | Cotton                                                | 0.0087 | Heterozygous/Uncertain |
| 7_1_15 | 11.00 | <i>H. armigera</i>  | Brazil | Bahia      | Apr-13 | Cotton                                                | 0.0099 | Present                |
| 7_1_16 | 9.45  | <i>H. armigera</i>  | Brazil | Bahia      | Apr-13 | Cotton                                                | 0.0055 | Present                |
| 7_1_17 | 5.72  | <i>H. armigera</i>  | Brazil | Bahia      | Apr-13 | Cotton                                                | 0.0031 | Heterozygous/Uncertain |
| 7_1_18 | 31.00 | <i>H. armigera</i>  | Brazil | Bahia      | Apr-13 | Cotton                                                | 0.0342 | Present                |
| 7_1_2  | 55.37 | <i>H. armigera</i>  | Brazil | Bahia      | Feb-13 | Cotton                                                | 0.0440 | Present                |
| 7_1_20 | 11.64 | <i>Early hybrid</i> | Brazil | Bahia      | Feb-13 | Cotton                                                | 0.4025 | Heterozygous/Uncertain |
| 7_1_21 | 13.33 | <i>H. armigera</i>  | Brazil | Bahia      | Feb-13 | Cotton                                                | 0.0154 | Present                |
| 7_1_23 | 16.14 | <i>H. armigera</i>  | Brazil | Bahia      | Feb-13 | Cotton                                                | 0.0159 | Present                |

|        |       |                    |        |       |        |                  |        |                        |
|--------|-------|--------------------|--------|-------|--------|------------------|--------|------------------------|
| 7_1_24 | 13.82 | <i>H. armigera</i> | Brazil | Bahia | Feb-13 | Cotton           | 0.0111 | Present                |
| 7_1_3  | 9.66  | <i>H. armigera</i> | Brazil | Bahia | Feb-13 | Cotton           | 0.0052 | Present                |
| 7_1_6  | 33.73 | <i>H. armigera</i> | Brazil | Bahia | Feb-13 | Cotton           | 0.0426 | Present                |
| 7_1_7  | 21.86 | <i>H. armigera</i> | Brazil | Bahia | Feb-13 | Cotton           | 0.0346 | Present                |
| 7_1_8  | 43.26 | <i>H. armigera</i> | Brazil | Bahia | Feb-13 | Cotton           | 0.0299 | Heterozygous/Uncertain |
| 7_1_9  | 25.87 | <i>H. armigera</i> | Brazil | Bahia | Feb-13 | Cotton           | 0.0370 | Present                |
| 7_5_10 | 9.25  | <i>H.zea</i>       | Brazil | Bahia | Feb-17 | Cotton<br>not Bt | 0.9704 | Heterozygous/Absent    |
| 7_5_11 | 10.61 | <i>H.zea</i>       | Brazil | Bahia | Feb-17 | Cotton<br>not Bt | 0.9683 | Heterozygous/Absent    |
| 7_5_12 | 6.97  | <i>H.zea</i>       | Brazil | Bahia | Jun-17 | Cotton<br>not Bt | 0.9695 | Heterozygous/Absent    |
| 7_5_13 | 8.12  | <i>H.zea</i>       | Brazil | Bahia | Jan-17 | Cotton<br>not Bt | 0.9680 | Present                |
| 7_5_14 | 7.22  | <i>H. armigera</i> | Brazil | Bahia | Jan-17 | Cotton<br>not Bt | 0.0026 | Present                |
| 7_5_15 | 11.42 | <i>H. armigera</i> | Brazil | Bahia | Jan-17 | Cotton<br>not Bt | 0.0104 | Heterozygous/Uncertain |
| 7_5_16 | 11.28 | <i>H. armigera</i> | Brazil | Bahia | Jan-17 | Cotton<br>not Bt | 0.0079 | Present                |
| 7_5_17 | 8.22  | <i>H. armigera</i> | Brazil | Bahia | Feb-17 | Cotton<br>not Bt | 0.0030 | Present                |
| 7_5_18 | 4.49  | <i>H. armigera</i> | Brazil | Bahia | Feb-17 | Cotton<br>not Bt | 0.0005 | Heterozygous/Uncertain |
| 7_5_20 | 5.08  | <i>H.zea</i>       | Brazil | Bahia | Nov-16 | Soya             | 0.9555 | Present                |
| 7_5_21 | 4.58  | <i>H. armigera</i> | Brazil | Bahia | Nov-16 | Soya             | 0.0004 | Present                |
| 7_5_22 | 10.22 | <i>H. armigera</i> | Brazil | Bahia | Nov-16 | Soya             | 0.0089 | Present                |
| 7_5_24 | 4.44  | <i>H. armigera</i> | Brazil | Bahia | Nov-16 | Soya             | 0.0004 | Present                |
| 7_5_26 | 6.40  | <i>H. armigera</i> | Brazil | Bahia | Apr-17 | Cotton<br>not Bt | 0.0033 | Present                |
| 7_5_27 | 5.34  | <i>H. armigera</i> | Brazil | Bahia | Apr-17 | Cotton<br>not Bt | 0.0018 | Present                |
| 7_5_28 | 5.04  | <i>H.zea</i>       | Brazil | Bahia | Apr-17 | Cotton<br>not Bt | 0.9793 | Present                |



|               |       |                    |              |             |        |                  |        |                        |
|---------------|-------|--------------------|--------------|-------------|--------|------------------|--------|------------------------|
| 7_5_29        | 7.57  | <i>H. armigera</i> | Brazil       | Bahia       | Apr-17 | Cotton<br>not Bt | 0.0041 | Present                |
| 7_5_8         | 10.21 | <i>H.zea</i>       | Brazil       | Bahia       | Feb-17 | Cotton<br>not Bt | 0.9725 | Heterozygous/Uncertain |
| 7_5_9         | 11.28 | <i>H.zea</i>       | Brazil       | Bahia       | Feb-17 | Cotton<br>not Bt | 0.9751 | Heterozygous/Uncertain |
| BF0005        | 14.84 | <i>H. armigera</i> | Burkina Faso | Diapaga     | Jun-05 | Cotton<br>not Bt | 0.0000 | Present                |
| BR0008        | 10.05 | <i>H. armigera</i> | Brazil       | Maranhao    | Jul-05 | Cotton           | 0.0074 | Present                |
| BR0030        | 8.99  | <i>H. armigera</i> | Brazil       | Mato Grosso | Jul-05 | Cotton           | 0.0066 | Present                |
| BR0032        | 5.48  | <i>H. armigera</i> | Brazil       | Mato Grosso | Jul-05 | Cotton           | 0.0016 | Present                |
| BR0034        | 4.86  | <i>H. armigera</i> | Brazil       | Mato Grosso | Jul-05 | Cotton           | 0.0015 | Present                |
| BR0036        | 4.29  | <i>H. armigera</i> | Brazil       | Mato Grosso | Jul-05 | Cotton           | 0.0006 | Present                |
| BR0045        | 10.56 | <i>H. armigera</i> | Brazil       | Mato Grosso | Jul-05 | Cotton           | 0.0060 | Present                |
| BR0050        | 11.41 | <i>H. armigera</i> | Brazil       | Mato Grosso | Jul-05 | Cotton           | 0.0098 | Present                |
| BR0051        | 7.82  | <i>H. armigera</i> | Brazil       | Mato Grosso | Jul-05 | Cotton           | 0.0029 | Present                |
| BR0086        | 8.40  | <i>H. armigera</i> | Brazil       | Mato Grosso | Jul-05 | Cotton           | 0.0057 | Present                |
| BR0101        | 4.75  | <i>H. armigera</i> | Brazil       | Mato Grosso | Jul-05 | Cotton           | 0.0028 | Present                |
| BR0135        | 9.77  | <i>H. armigera</i> | Brazil       | Mato Grosso | Jul-05 | Cotton           | 0.0054 | Present                |
| Bra_Mig132_S5 | 8.43  | <i>H.zea</i>       | Brazil       | Mato Grosso | Jul-05 | NA               | NA     | Absent                 |
| Bra_Mig47_S4  | 29.91 | <i>H.zea</i>       | Brazil       | Mato Grosso | Jul-05 | NA               | NA     | Absent                 |
| Bra_Mig69_S3  | 27.74 | <i>H.zea</i>       | Brazil       | Mato Grosso | Jul-05 | NA               | NA     | Absent                 |
| Bra_Mig75_S2  | 24.67 | <i>H.zea</i>       | Brazil       | Mato Grosso | Jul-05 | NA               | NA     | Absent                 |
| Bra_Mig76_S1  | 21.93 | <i>H.zea</i>       | Brazil       | Mato Grosso | Jul-05 | NA               | NA     | Absent                 |
| FR0003        | 7.90  | <i>H. armigera</i> | Francia      | Corsica     | Jul-05 | Vicia<br>fabae   | 0.0000 | Present                |
| FR0009        | 8.38  | <i>H. armigera</i> | Francia      | Corsica     | Jul-05 | Vicia<br>fabae   | 0.0000 | Present                |
| H2B21_S6      | 31.77 | <i>H.zea</i>       | Brazil       | Mato Grosso | Jun-05 | NA               | NA     | Absent                 |
| H2B22_S7      | 38.01 | <i>H.zea</i>       | Brazil       | Mato Grosso | Jun-05 | NA               | NA     | Absent                 |
| H2B23_S8      | 37.42 | <i>H.zea</i>       | Brazil       | Mato Grosso | Jun-05 | NA               | NA     | Absent                 |

|                      |       |                      |               |                 |        |          |        |         |
|----------------------|-------|----------------------|---------------|-----------------|--------|----------|--------|---------|
| H2B24_S9             | 34.02 | <i>H.zea</i>         | Brazil        | Mato Grosso     | Jun-05 | NA       | NA     | Absent  |
| HM0002               | 4.83  | <i>H. armigera</i>   | Australia     | NSW             | Jul-05 | Cotton   | NA     | Present |
| HM0003               | 5.69  | <i>H. armigera</i>   | Australia     | NSW             | Jul-05 | Cotton   | NA     | Present |
| HM0004               | 3.89  | <i>H. armigera</i>   | Australia     | NSW             | Jul-05 | Cotton   | NA     | Present |
| IS0008               | 14.12 | <i>H. armigera</i>   | India         | Yavtamal        | Jun-05 | Eggplant | 0.0000 | Present |
| Index_125_702_501    | 2.97  | <i>H. armigera</i>   | Brazil        | Mato Grosso     | Jun-13 | NA       | 0.0001 | Present |
| Index_131_704_501    | 4.49  | <i>H. armigera</i>   | Brazil        | Mato Grosso     | Jun-13 | NA       | 0.0006 | Absent  |
| Index_132_705_502    | 1.79  | <i>H.zea</i>         | Brazil        | Mato Grosso     | Jun-13 | NA       | 0.9987 | Absent  |
| Index_134_705_503    | 2.37  | <i>H.zea</i>         | Brazil        | Mato Grosso     | Jun-13 | NA       | 0.9981 | Absent  |
| Index_70_703_503     | 5.37  | <i>H.zea</i>         | Brazil        | Mato Grosso     | NA     | NA       | 0.9801 | Absent  |
| Index_73_702_503     | 6.47  | <i>H.zea</i>         | Brazil        | Mato Grosso     | NA     | NA       | 0.9729 | Absent  |
| Index_BRA2_704_503   | 7.90  | <i>H. armigera</i>   | Brazil        | Mato Grosso     | Apr-13 | NA       | 0.0051 | Present |
| Index_BRA4_701_504   | 5.72  | <i>H. armigera</i>   | Brazil        | Mato Grosso     | Apr-13 | NA       | 0.0021 | Present |
| Index_HZRL10_703_502 | 5.29  | <i>H.zea</i>         | United States | Riverland, NY   | Dec-05 | Corn     | 1.0000 | Absent  |
| Index_HZRL12_701_503 | 3.06  | <i>H.zea</i>         | United States | Riverland, NY   | Dec-05 | Corn     | 1.0000 | Absent  |
| Index_HZRL17_705_504 | 3.38  | <i>H.zea</i>         | United States | Riverland, NY   | Dec-05 | Corn     | 1.0000 | Absent  |
| Index_HZRL20_704_502 | 5.67  | <i>H.zea</i>         | United States | Riverland, NY   | Dec-05 | Corn     | 1.0000 | Absent  |
| Index_TPG2_701_501   | 5.09  | <i>H. armigera</i>   | Brazil        | Goias,Palmeiras | Aug-13 | Tomato   | 0.0000 | Present |
| M0001                | 18.96 | <i>H. armigera</i>   | Australia     | NSW             | Jul-05 | Cotton   | NA     | Present |
| M0087                | 8.41  | <i>H. punctigera</i> | Australia     | NSW             | Jul-05 | Cotton   | NA     | -       |
| M0163                | 14.16 | <i>H. armigera</i>   | Australia     | NSW             | Jul-05 | Cotton   | NA     | Present |
| M0236                | 5.33  | <i>H. punctigera</i> | Australia     | NSW             | Jul-05 | Cotton   | NA     | -       |
| M0243                | 11.30 | <i>H. armigera</i>   | Australia     | NSW             | Jul-05 | Cotton   | NA     | Present |
| M0244                | 5.19  | <i>H. punctigera</i> | Australia     | NSW             | Jul-05 | Cotton   | NA     | -       |
| M0245                | 4.87  | <i>H. punctigera</i> | Australia     | NSW             | Jul-05 | Cotton   | NA     | -       |
| M0250                | 11.36 | <i>H. armigera</i>   | Australia     | NSW             | Jul-05 | Cotton   | NA     | Present |
| M0251                | 9.68  | <i>H. armigera</i>   | Australia     | NSW             | Jul-05 | Cotton   | NA     | Present |
| M0261                | 10.30 | <i>H. armigera</i>   | Australia     | NSW             | Jul-05 | Cotton   | NA     | Present |

|                |       |                      |               |                     |        |                        |        |         |
|----------------|-------|----------------------|---------------|---------------------|--------|------------------------|--------|---------|
| M0263          | 4.94  | <i>H. punctigera</i> | Australia     | NSW                 | Jul-05 | Cotton                 | NA     | -       |
| M0264          | 6.22  | <i>H. punctigera</i> | Australia     | NSW                 | Jul-05 | Cotton                 | NA     | -       |
| M0270          | 11.62 | <i>H. armigera</i>   | Australia     | NSW                 | Jul-05 | Cotton                 | NA     | Present |
| M0272          | 6.37  | <i>H. armigera</i>   | Australia     | NSW                 | Jul-05 | Cotton                 | NA     | Absent  |
| M0273          | 15.44 | <i>H. armigera</i>   | Australia     | NSW                 | Jul-05 | Cotton                 | NA     | Present |
| M0276          | 3.68  | <i>H. armigera</i>   | Australia     | NSW                 | Jul-05 | Cotton                 | NA     | Present |
| M0299          | 5.29  | <i>H. armigera</i>   | Australia     | NSW                 | Jul-05 | Cotton                 | NA     | Present |
| MD0014         | 14.35 | <i>H. armigera</i>   | Madagascar    | Antsirabe           | Jun-05 | Corn                   | 0.0000 | Present |
| SE0053         | 10.25 | <i>H. armigera</i>   | Spain         | Sevilla             | Jul-05 | <i>Medicago</i><br>sp. | 0.0000 | Present |
| SN0045         | 17.07 | <i>H. armigera</i>   | Senegal       | Noto                | Jun-05 | Tomato                 | 0.0000 | Present |
| SRR5332777     | 19.90 | <i>H.zea</i>         | United States | Mississippi         | Mar-15 | Wild host<br>(Clover)  | 1.0000 | Absent  |
| SRR5332778     | 10.67 | <i>H.zea</i>         | United States | Mississippi         | Mar-15 | Wild host<br>(Clover)  | 1.0000 | Absent  |
| SRR5332814     | 13.07 | <i>H.zea</i>         | United States | Mississippi         | Mar-15 | Wild host<br>(Clover)  | 1.0000 | Absent  |
| SRR5332816     | 25.86 | <i>H.zea</i>         | United States | Mississippi         | Mar-15 | Wild host<br>(Clover)  | 1.0000 | Absent  |
| TI0002         | 16.60 | <i>H. armigera</i>   | Asia          | NA                  | NA     | NA                     | 0.0000 | Present |
| TMG4_N701_S501 | 27.72 | <i>Early hybrid</i>  | Brazil        | Goiás,<br>Morrinhos | Aug-13 | Tomato                 | 0.4739 | Present |
| YC0048         | 6.31  | <i>H. armigera</i>   | China         | Yancheng            | Jul-05 | NA                     | 0.0000 | Present |

## References

1. Patterson N, Moorjani P, Luo Y, Mallick S, Rohland N, Zhan Y, et al. Ancient Admixture in Human History. *Genetics*. Nov. de 2012;192(3):1065–93.
